# Supplementary material for: Research efficacy of gaseous ozone therapy as an adjuvant to periodontal treatment on oxidative stress mediators in patients with type 2 diabetes: a randomized clinical trial
Source: Springer Nature journal article supplement (doi:10.1186/s12903-023-02985-1), 2023-05-11
Supplement: MOESM2 [file 25346402]

**Appendix 1. Correlations between Dependent Variables**

| Variable   | 1        | 2       | 3       | 4        | 5       | 6        | 7      | 8      | 9      | 10      | 11     | 12      | 13      | 14     | 15 |
|------------|----------|---------|---------|----------|---------|----------|--------|--------|--------|---------|--------|---------|---------|--------|----|
| 1. TOS_T0  | -        |         |         |          |         |          |        |        |        |         |        |         |         |        |    |
| 2. TOS_T1  | 0.939    | -       |         |          |         |          |        |        |        |         |        |         |         |        |    |
| 3. TOS_T2  | 0.807    | 0.905   | -       |          |         |          |        |        |        |         |        |         |         |        |    |
| 4. TAS_T1  | -0.0707  | -0.0658 | -0.0736 | -        |         |          |        |        |        |         |        |         |         |        |    |
| 5. TAS_T2  | -0.0951  | -0.133  | -0.151  | 0.967    | -       |          |        |        |        |         |        |         |         |        |    |
| 6. TAS_T0  | -0.0103  | 0.0494  | 0.0542  | 0.862    | 0.777   | -        |        |        |        |         |        |         |         |        |    |
| 7. BOP_T2  | 0.114    | 0.195   | 0.224   | -0.0685  | -0.130  | 0.0275   | -      |        |        |         |        |         |         |        |    |
| 8. PPD_T2  | -0.0650  | -0.0191 | 0.0521  | -0.118   | -0.151  | 0.00683  | 0.223  | -      |        |         |        |         |         |        |    |
| 9. CAL_T2  | -0.177   | -0.232  | -0.277  | 0.279    | 0.287   | 0.242    | 0.0689 | 0.394  | -      |         |        |         |         |        |    |
| 10. BOP_T0 | 0.00806  | -0.115  | -0.188  | -0.0235  | -0.0117 | -0.143   | 0.297  | -0.134 | 0.0242 | -       |        |         |         |        |    |
| 11. GSH_T0 | -0.00792 | -0.0531 | 0.00920 | -0.369   | -0.378  | -0.356   | 0.251  | 0.349  | 0.0119 | 0.183   | -      |         |         |        |    |
| 12. CAL_T0 | 0.288    | 0.289   | 0.259   | -0.00534 | -0.0287 | -0.00608 | -0.184 | -0.150 | -0.118 | -0.0996 | -0.131 | -       |         |        |    |
| 13. BOP_T1 | 0.0214   | 0.0322  | 0.0354  | -0.104   | -0.165  | -0.0791  | 0.576  | 0.0947 | 0.0782 | 0.485   | 0.0390 | -0.0877 | -       |        |    |
| 14. GSH_T1 | 0.112    | 0.0399  | -0.0704 | -0.0846  | -0.0353 | -0.0847  | 0.117  | -0.225 | 0.0431 | 0.248   | -0.227 | 0.0504  | 0.00596 | -      |    |
| 15. CAL_T1 | -0.345   | -0.232  | -0.0874 | 0.302    | 0.290   | 0.346    | 0.177  | 0.203  | 0.408  | -0.263  | -0.283 | -0.0919 | 0.0577  | -0.160 | -  |
